# Supplementary material for: Electrochemical sensor based on lead ion-imprinted polymer particles for ultra-trace determination of lead ions in different real samples
Source: Royal Society of Chemistry journal article supplement (doi:10.1039/c6ra25791g), 2017-01-01
Supplement: c6ra25791g1.pdf [file c6ra25791g1.pdf]

## Supporting information

Electrochemical sensor based on lead ion-imprinted polymer particles for ultra-trace determination of lead ions in different real samples

Xuan Luo<sup>1</sup>, Weihong Huang<sup>1</sup>, Qingye Shi<sup>2</sup>, Wanzhen Xu<sup>1\*</sup>, Yu Luan<sup>3</sup>, Yanfei Yang<sup>3</sup>, Huajie Wang<sup>2</sup>, Wenming Yang<sup>2\*</sup>

<sup>1</sup>*School of the Environment and Safety Engineering, Jiangsu University, Zhenjiang 212013, China*

<sup>2</sup>*School of Materials Science and Engineering, Jiangsu University, Zhenjiang 212013, China*

<sup>3</sup>*Zhenjiang Institute for Drug Control of Jiangsu Province, Zhenjiang 212013, China*

\* Corresponding author: Wanzhen Xu (E-mail: [xwz09@ujs.edu.cn](mailto:xwz09@ujs.edu.cn)), Wenming Yang (E-mail: [ywm@ujs.edu.cn](mailto:ywm@ujs.edu.cn))

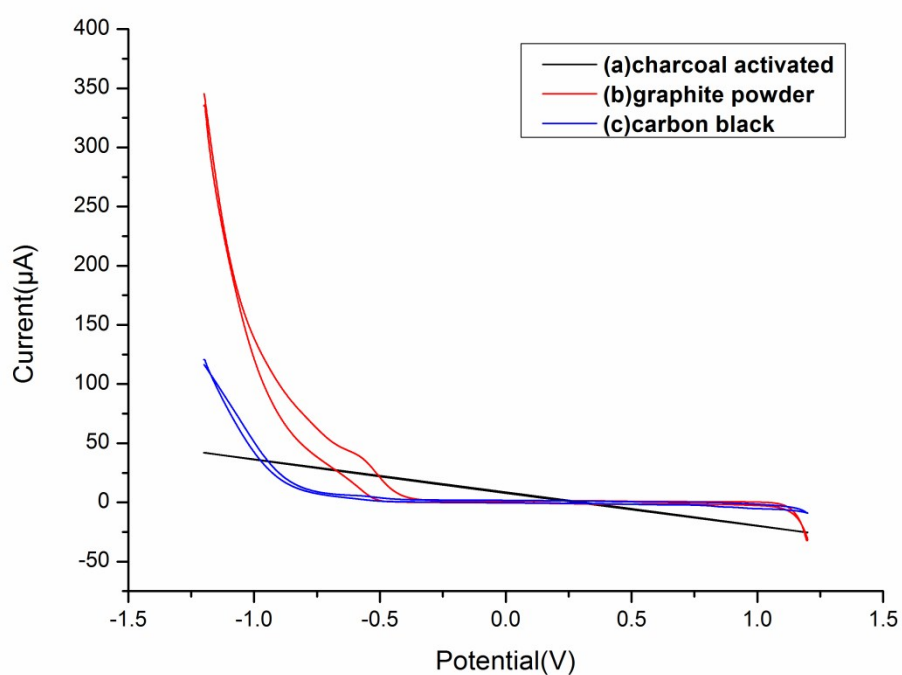

**Fig.S1** The current response of different carbon forms(a. charcoal activated b. Graphite powder c. Carbon black)

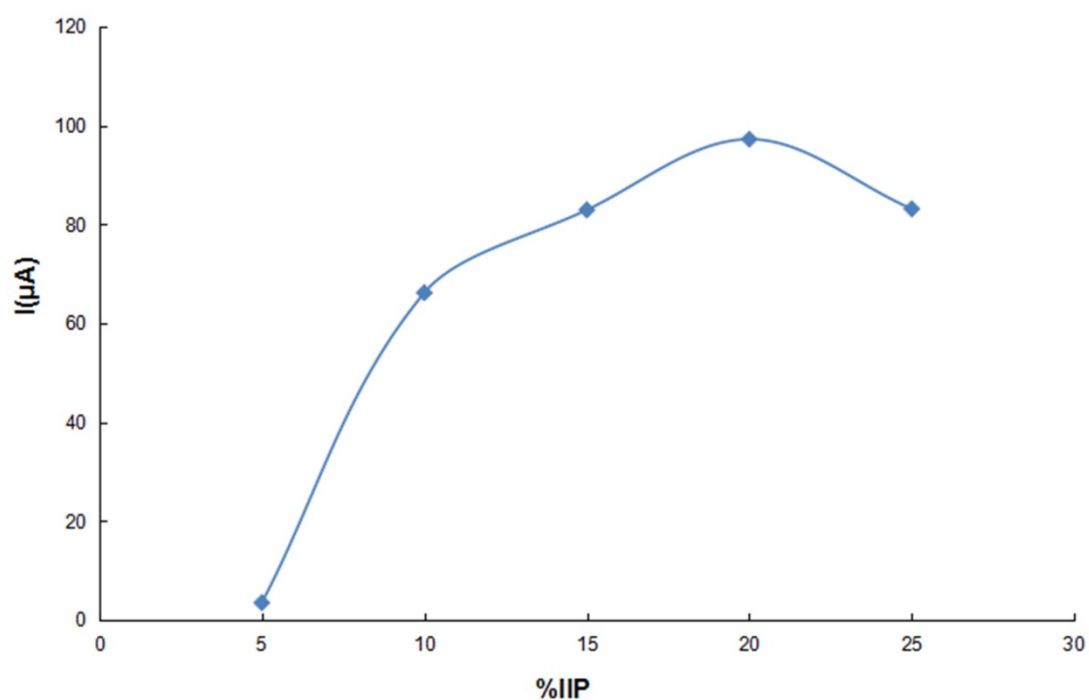

**Fig.S2** The influence of IIP composition percent on the graphite powder/IIP/paraffin oil electrode.

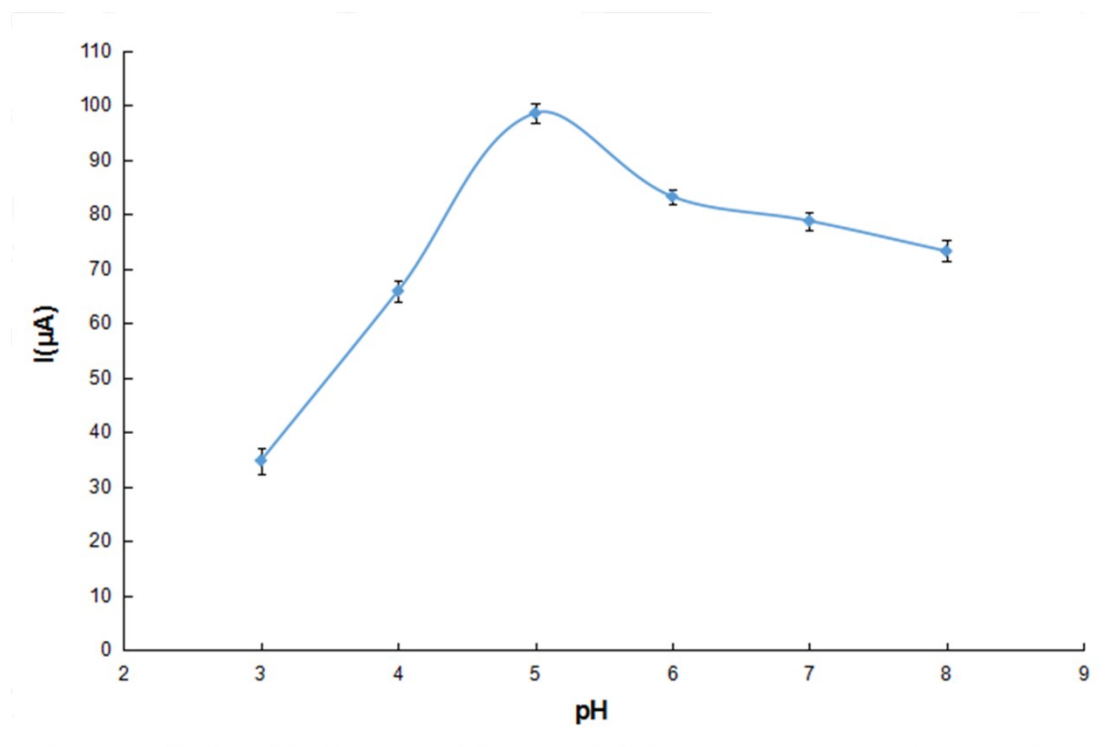

**Fig.S3** Differential pulse voltammetry of  $5.0 \times 10^{-7} \text{ mol L}^{-1} \text{ Pb}^{2+}$  on IIP-CPE at different

pH.(n=5)

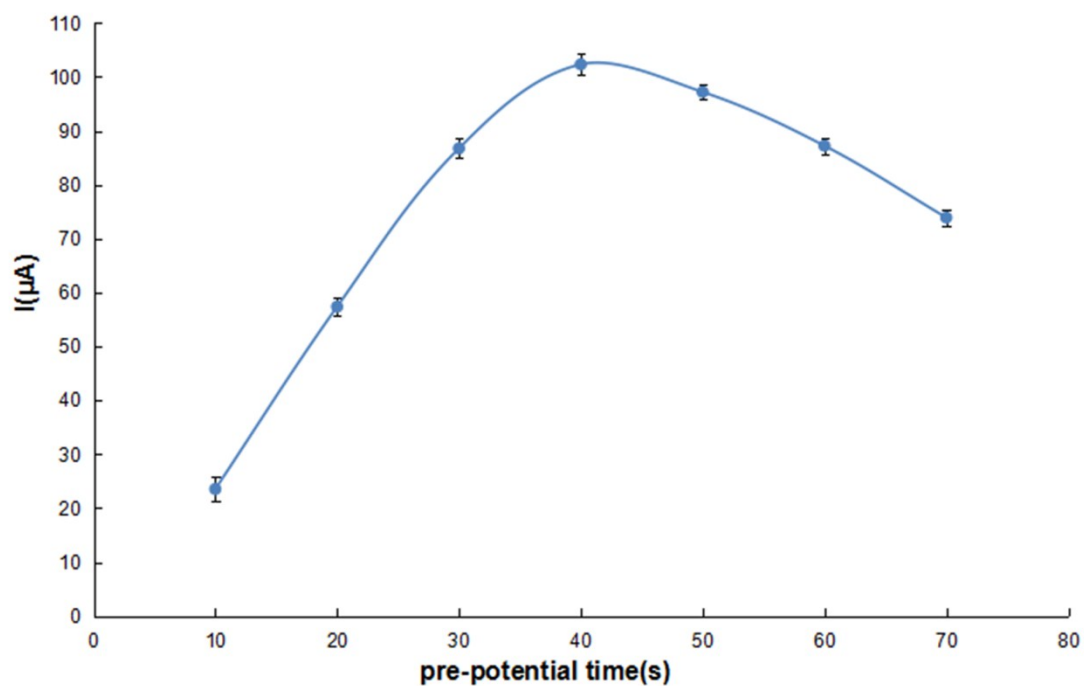

**Fig.S4** Effect of pre-potential time on IIP-CPE response of  $5.0 \times 10^{-7} \text{mol L}^{-1} \text{Pb}^{2+}$  at pH 5.0.(n=5)

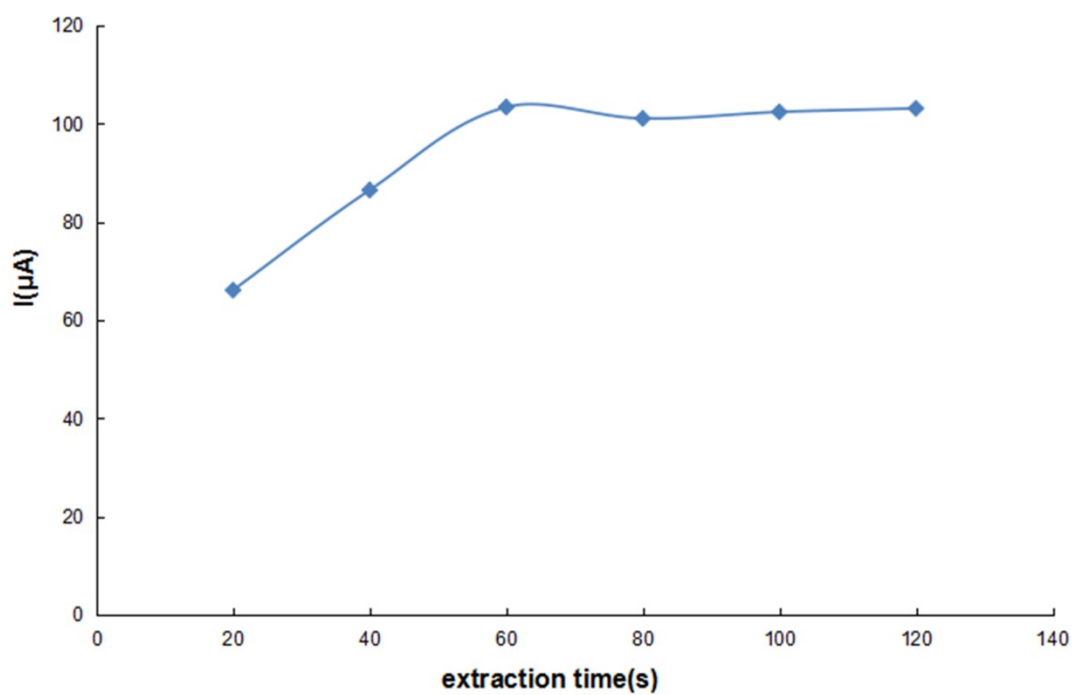

**Fig.S5** Effect of extraction time on IIP-CPE response of  $5.0 \times 10^{-7} \text{mol L}^{-1} \text{Pb}^{2+}$  at pH 5.0.

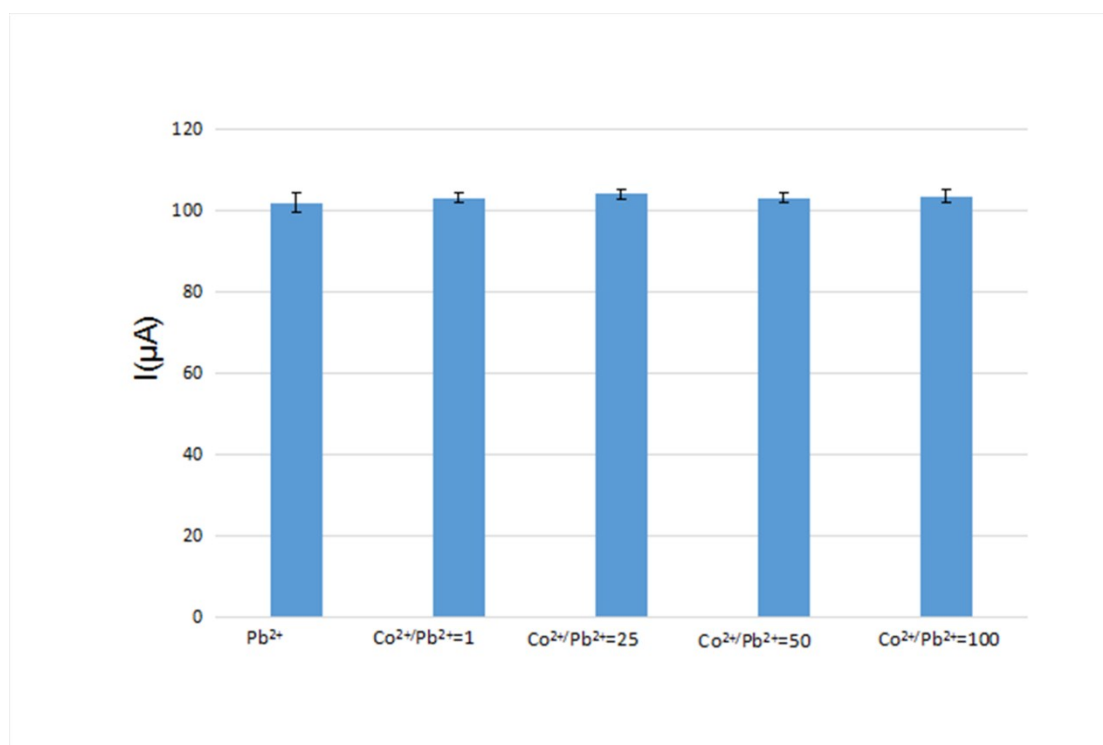

**Fig.S6** Comparison of the electrode selectivity of Pb<sup>2+</sup> ion in the presence of Co<sup>2+</sup> at various concentrations: [Pb<sup>2+</sup>]=5.0×10<sup>-7</sup>mol L<sup>-1</sup>, extraction time 80s, stripping voltammetry conditions: E-conditioning= -1.0V, conditioning time=40s, scan rate=0.1V s<sup>-1</sup>.(n=5)

| Species                                                                                                       | Interference level |
|---------------------------------------------------------------------------------------------------------------|--------------------|
| Alkali                                                                                                        | No interference    |
| Cd <sup>2+</sup> , Co <sup>2+</sup> , Zn <sup>2+</sup> , Cr <sup>3+</sup> , Ag <sup>+</sup> ,Hg <sup>2+</sup> | No interference    |
| Cu <sup>2+</sup>                                                                                              | >10                |
| Fe <sup>3+</sup>                                                                                              | >15                |
| Mn <sup>2+</sup>                                                                                              | >100               |

**Table S1** Interference levels of different tested ions in the determination of Pb<sup>2+</sup> by prepared sensor.
